# Supplementary material for: Water demand management: Visualising a public good
Source: PLOS journal article supplement (doi:10.1371/journal.pone.0234621), 2020-06-16

Supplement 1 Eight patterns of water vessel visuals with different water levels

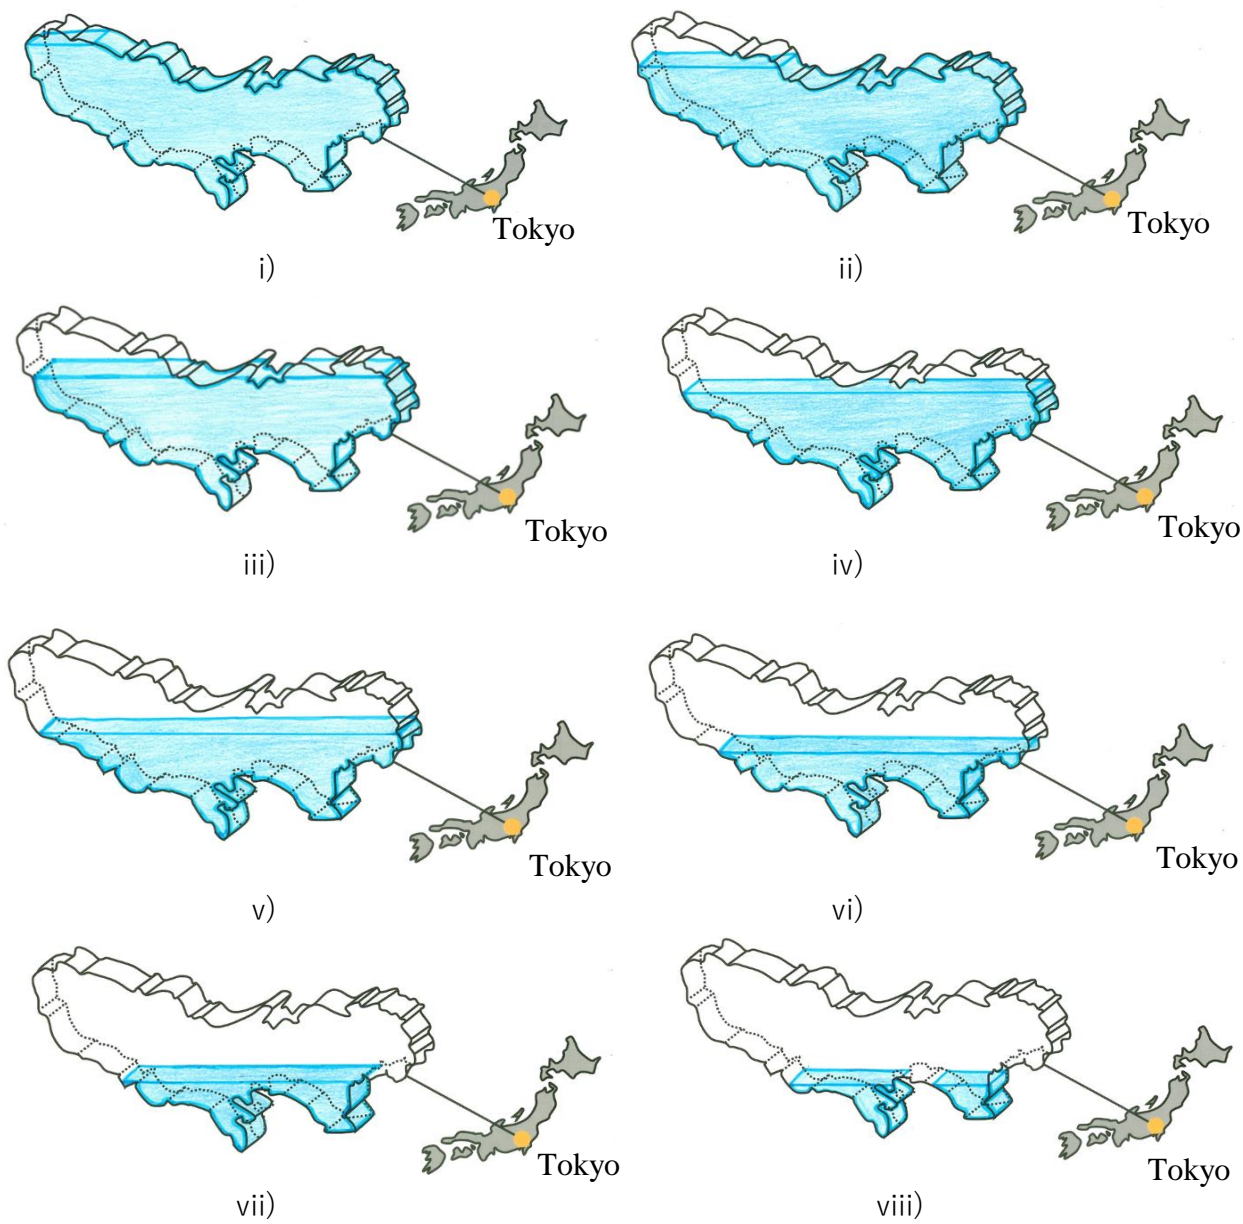

Supplement: S1 (10.1371/journal.pone.0234621.s001) [file journal.pone.0234621.s001]
