# Supplementary material for: Water demand management: Visualising a public good
Source: PLOS journal article supplement (doi:10.1371/journal.pone.0234621), 2020-06-16
Supplement: S3 (10.1371/journal.pone.0234621.s003) [file journal.pone.0234621.s003]

Suppliment 3 Distribution of the numbers of family members

| Family size    | Number of households |    |    |    |   |   |
|----------------|----------------------|----|----|----|---|---|
|                | 1                    | 2  | 3  | 4  | 5 | 6 |
| Control Group  | 12                   | 25 | 20 | 15 | 3 | 0 |
| Feedback Group | 11                   | 21 | 8  | 15 | 3 | 1 |
